# Supplementary material for: Inpainting radar missing data regions with deep learning
Source: Copernicus journal article supplement (doi:10.5194/amt-14-7729-2021), 2021-12-09
Supplement: Supplementary file 1 [file amt-14-7729-2021-supplement.zip]

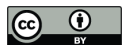

## *Supplement of*

# **Inpainting radar missing data regions with deep learning**

**Andrew Geiss and Joseph C. Hardin**

*Correspondence to:* Andrew Geiss ([andrew.geiss@pnnl.gov](mailto:andrew.geiss@pnnl.gov))

- `amt-14-7729-2021-supplement-title-page.pdf`
- `supplement`
  - `additional_emd_plots`
    - \* `blockage_emd.png`
    - \* `downfill_emd.png`
    - \* `outage_emd.png`
  - `additional_psd_plots`
    - \* `blockage_ref_psd.png`
    - \* `blockage_vel_psd.png`
    - \* `blockage_wid_psd.png`
    - \* `downfill_ref_psd.png`
    - \* `downfill_vel_psd.png`
    - \* `downfill_wid_psd.png`
    - \* `outage_ref_psd.png`
    - \* `outage_vel_psd.png`
    - \* `outage_wid_psd.png`
  - `cnn_diagrams`
    - \* `cgan_blockage.png`
    - \* `cgan_outage_downfill.png`
    - \* `discriminator_blockage.png`
    - \* `discriminator_outage_downfill.png`
    - \* `l1_blockage.png`
    - \* `l1_outage_downfill.png`

The copyright of individual parts of the supplement might differ from the article licence.
